# Supplementary material for: Self-assembly of cobalt hexacyanoferrate crystals in 1-D array using ion exchange transformation route for enhanced electrocatalytic oxidation of alkaline and neutral water
Source: Royal Society of Chemistry journal article supplement (doi:10.1039/c6ta03436e), 2016-01-01
Supplement: c6ta03436e1.pdf [file c6ta03436e1.pdf]

## Electronic Supplementary Information (ESI)

### Self-assembly of cobalt hexacyanoferrate crystals in 1-D array using ion exchange transformation route for enhanced electrocatalytic oxidation of alkaline and neutral water

Hoa Thi Bui,<sup>a</sup> Do Young Ahn,<sup>a</sup> Nabeen K. Shrestha,<sup>\*a</sup> Myung M. Sung,<sup>a</sup> Jong Kee Lee,<sup>b</sup> and Sung-Hwan Han<sup>\*a</sup>

<sup>a</sup>*Institute of Materials Design, Department of Chemistry, Hanyang University, Seongdong-gu, 133791 Seoul, Republic of Korea.*

<sup>b</sup>*Energy Storage Research Centre, Korea Institute of Science and Technology, Hwarangno 14-gil 5, Seongbuk-gu, 136791 Seoul, Republic of Korea.*

---

\* Corresponding authors.

E-mail addresses: [nabeenkshrestha@hotmail.com](mailto:nabeenkshrestha@hotmail.com) (N.K. Shresths); [shhan@hanyang.ac.kr](mailto:shhan@hanyang.ac.kr) (S. -H. Han).

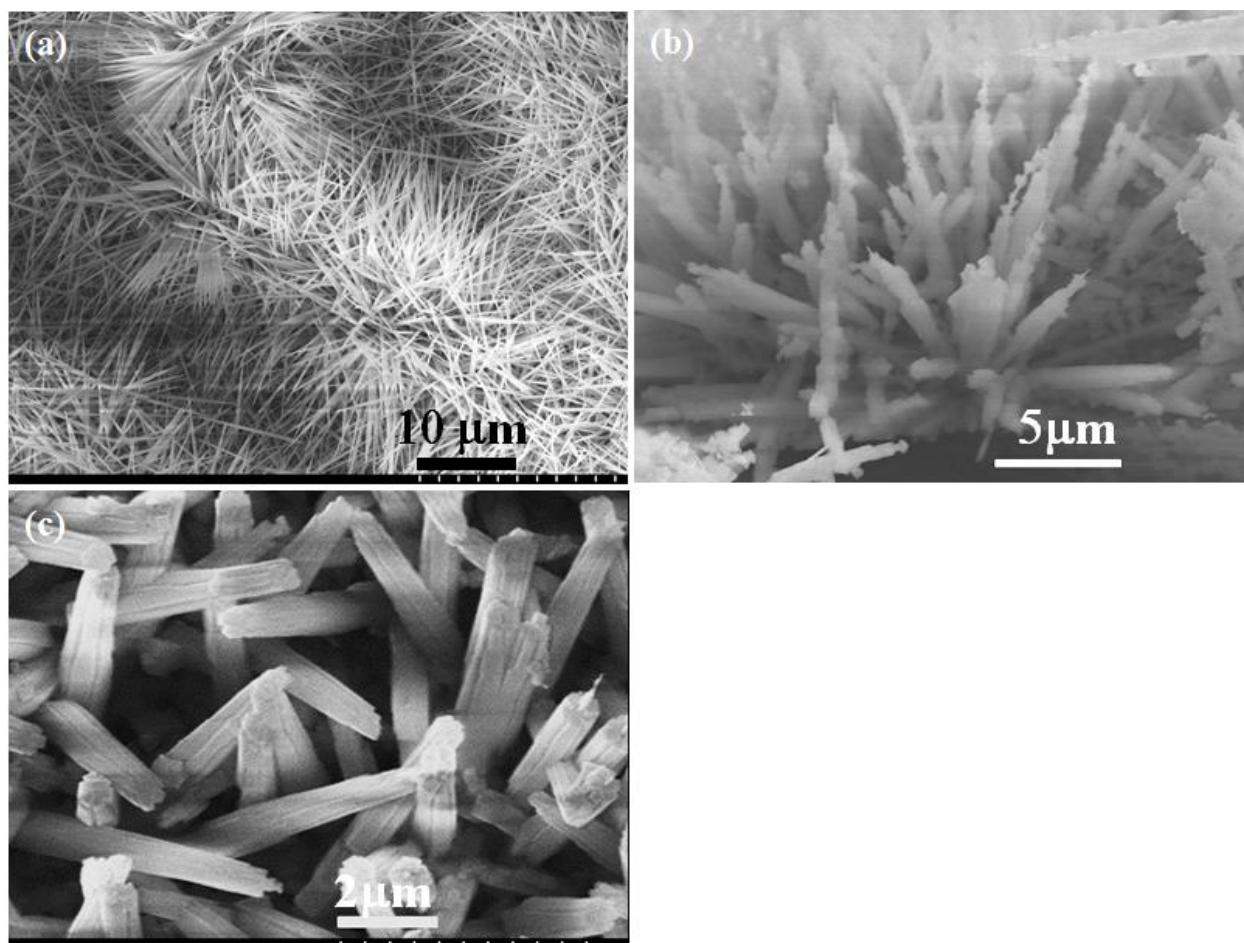

**Fig. S1.** SEM images of 1-D structured film on a carbon paper substrate. (a) Cobalt hydroxycarbonate, and cobalt hexacyanoferrate obtained by ion exchange reaction for (b) 60 min, and (c) 90 min.

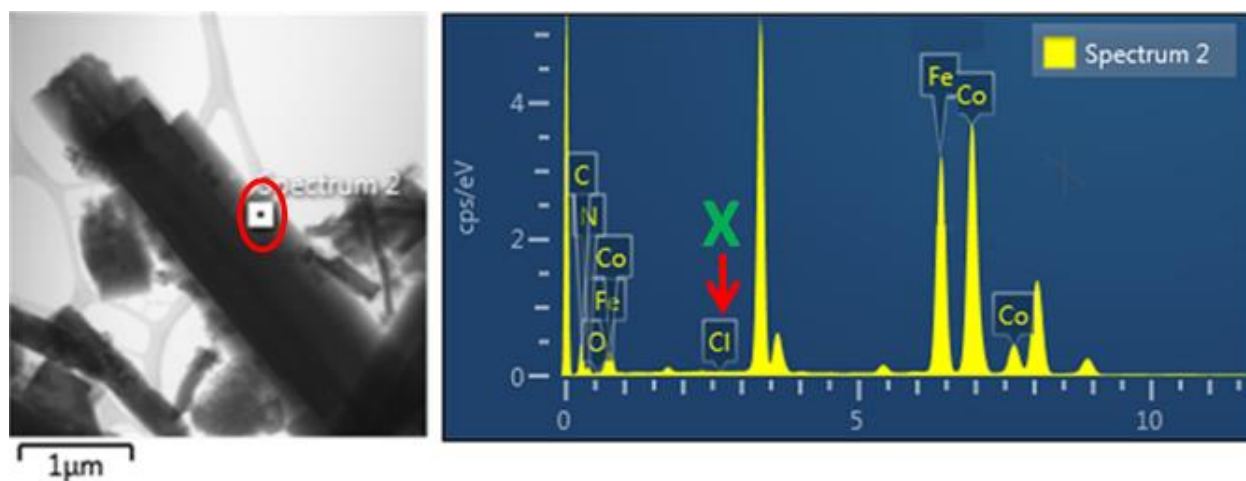

**Fig. S2.** TEM image and the EDX profile of the area shown by red circle in the TEM image of 1-D cobalt hexacyanoferrate structure obtained by ion exchange reaction for 90 min.

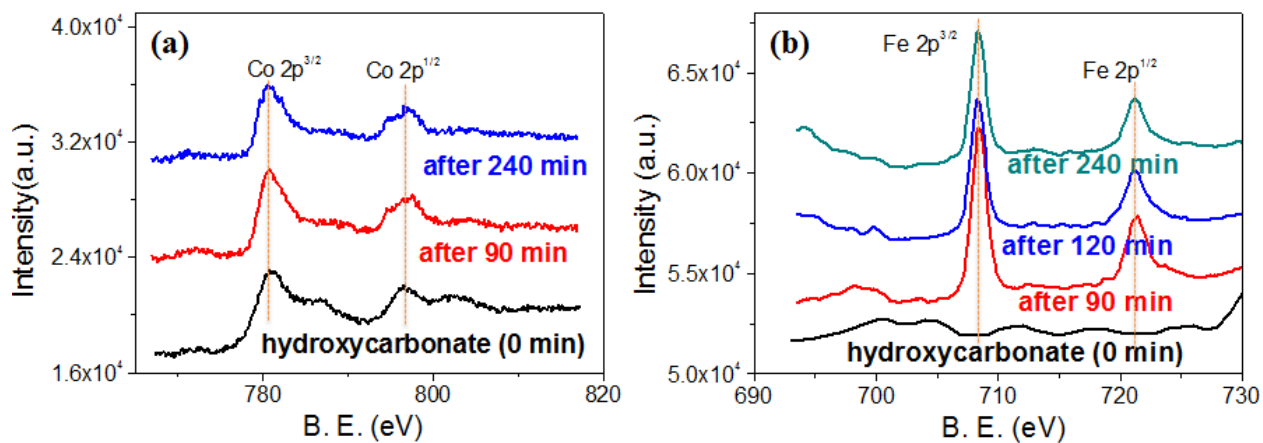

**Fig. S3.** XPS spectra of cobalt hydroxycarbonate film (0 min), and cobalt hexacyanoferrate film obtained by ion exchange reaction for 90, 120, and 240 min.

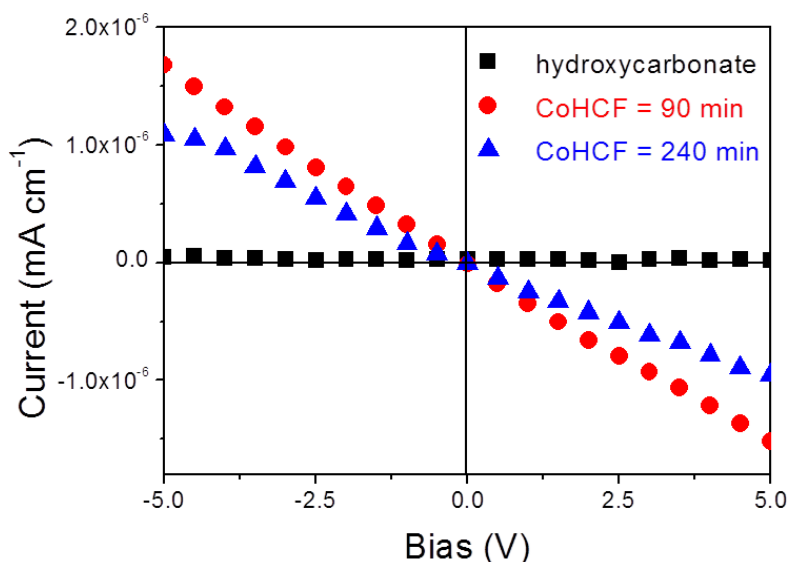

**Fig. S4.** Polarization of of cobalt hydroxycarbonate, and cobalt hexacyanoferrate film on a non-conducting glass substrate obtained by ion exchange reaction for 90, and 240 min, showing the degree of their electrical conductivity.

**Table S1:** Comparison of catalytic OER activity of various earth abundant catalysts

(Ir(20% wt)/C and RuO<sub>2</sub> catalysts have also been included as benchmark references)

| Catalyst                                        | Film*<br>/Powder** | Electrolyte                     | pH  | Catalyst<br>loading<br>(mgcm <sup>-2</sup> ) | Overpotential (V)       |                      | Reference                                           |
|-------------------------------------------------|--------------------|---------------------------------|-----|----------------------------------------------|-------------------------|----------------------|-----------------------------------------------------|
|                                                 |                    |                                 |     |                                              | 1mA<br>cm <sup>-2</sup> | 10mAcm <sup>-2</sup> |                                                     |
| 1-D CoHCF /CFP                                  | Film               | PBS                             | 7   | 0.7                                          | 0.47                    | 0.88                 | This work                                           |
| Ir(20% wt)/C                                    | Powder             | PBS                             | 7   | 0.04                                         | 0.57                    | 0.98                 |                                                     |
| CoHCF                                           | Powder             | Kpi buffer                      | 7   | –                                            | ~<br>0.58               | –                    | <i>J. Am. Chem. Soc.</i> , 2013, <b>135</b> , 13270 |
| $\alpha$ -MnO <sub>2</sub> -Py ...              | Powder             | Na <sub>2</sub> SO <sub>4</sub> | 7.5 | ~1600 nmol                                   | 0.66                    | –                    | <i>Nat. Commun.</i> 2014, <b>5</b> , 4256           |
| Mn <sub>3</sub> (PO <sub>4</sub> ) <sub>2</sub> | Powder             | PBS                             | 7   | 611 nmol                                     | 0.68                    | –                    | <i>J. Am. Chem. Soc.</i> 2014, <b>136</b> , 7435    |
| LiMnP <sub>2</sub> O <sub>7</sub>               | Film               | PBS                             | 7   | 1059 nmol                                    | 0.59                    | –                    | <i>J. Am. Chem. Soc.</i> 2014, <b>136</b> , 4201    |

|                                                                  |        |             |     |           |           |       |                                                            |
|------------------------------------------------------------------|--------|-------------|-----|-----------|-----------|-------|------------------------------------------------------------|
| MnOx                                                             | Film   | PBS         | 7   | 1800 nm   | 0.45      | –     | <i>J. Phys. Chem. C</i> , 2014, <b>118</b> , 14073         |
| Co-based                                                         | Film   | PBS         | 7   | 100 nmol  | 0.55      | –     | <i>Angew. Chem. Int. Ed.</i> 2015, <b>54</b> , 4870        |
| Fe-based                                                         | Film   | PBS         | 7   | 10.2 nmol | 0.48      | –     |                                                            |
| NiOx-en                                                          | Film   | NaBi buffer | 9.2 | 270 nmol  | 0.51      | –     |                                                            |
| NiOx-aqua                                                        | Film   | NaBi buffer | 9.2 | 280 nmol  | 0.57      | –     | <i>Energy Environ. Sci.</i> 2013, <b>6</b> , 579           |
| NiOx-NH <sub>3</sub>                                             | Film   | NaBi buffer | 9.2 | 290 nmol  | 0.60      | –     |                                                            |
| 1-D CoHCF /CFP                                                   | Film   | 1M KOH      | 14  | 0.7       | 0.34      | 0.42  |                                                            |
| Ir(20% wt)/C                                                     | Powder | 1M KOH      | 14  | 0.04      | 0.29      | 0.40  | <i>Nat Commun.</i> , 2015, <b>6</b> , 6616                 |
| RuO <sub>2</sub>                                                 | Powder | 0.1 M KOH   | 13  | –         | –         | 0.37  | <i>ACS Nano</i> ,2014, <b>8</b> , 3970                     |
| Co <sub>3</sub> O <sub>4</sub> /N-rmGO/NF                        | Powder | 1M KOH      |     | 1         | ~<br>0.28 | 0.31  | <i>Nat.Mater.</i> ,2011, <b>10</b> , 780                   |
| $\alpha$ -Ni(OH) <sub>2</sub> spheres                            | Powder | 0.1 M KOH   | 13  | –         | –         | 0.33  | <i>J.Am. Chem. Soc.</i> , 2014, <b>136</b> , 7077          |
| NiS <sub>1.3</sub>                                               | Film   | 1M KOH      | 14  | –         | –         | 0.35  | <i>Adv.Funct.Mater.</i> ,2015, <b>25</b> , 5739            |
| Co <sub>3</sub> O <sub>4</sub> -CuCo <sub>2</sub> O <sub>4</sub> | Powder | 0.1 M KOH   | 13  | 0.12      | 0.32      | 0.50  | <i>Chem.Mater.</i> 2013 , <b>25</b> , 4926                 |
| Fe-Co <sub>3</sub> O <sub>4</sub>                                | Powder | 0.1 M KOH   | 13  | 0.12      | 0.35      | 0.49  | <i>Chem. Mater.</i> 2014 , <b>26</b> , 3162                |
| Zn <sub>x</sub> Co <sub>3-x</sub> O <sub>4</sub>                 | Film   | 1M KOH      | 14  | 1         | –         | 0.32  | <i>Chem. Mater.</i> 2014 , <b>26</b> , 1889                |
| LiCoO <sub>2</sub>                                               | Film   | 0.1M KOH    | 13  | 0.25      | –         |       | <i>Nat. Commun.</i> 2014 , <b>5</b> , 3949                 |
| PNG-NiCo <sub>2</sub> O <sub>4</sub>                             | Film   | 0.1M KOH    | 13  | –         | –         | 0.35  | <i>ACS Nano</i> 2013 , <b>7</b> , 10190                    |
| Co <sub>3</sub> O <sub>4</sub> /NiCo <sub>2</sub> O <sub>4</sub> | Powder | 1M KOH      | 14  | 1         | –         | 0.34  | <i>J. Am. Chem. Soc.</i> 2015 , <b>137</b> , 5590          |
| CoO <sub>x</sub> @CN                                             | Powder | 1M KOH      | 14  | 1         | –         | 0.26  | <i>J. Am. Chem. Soc.</i> , 2015, <b>137</b> , 2688         |
| NiFe-LDH/CNT                                                     | Powder | 1M KOH      | 14  | 0.2       | –         | 0.25  | <i>J. Am. Chem. Soc.</i> 2013, <b>135</b> , 8452           |
| Zn-Co-LDH/CNT                                                    | Powder | 0.1M KOH    | 13  | 0.28      | –         | 0.55  | <i>J. Am. Chem. Soc.</i> 2013, <b>135</b> , 17242          |
| Zn-Co-LDH nanosheets                                             | Powder | 0.1M KOH    | 13  | 0.212     | –         | 0.48  | <i>J. Mater. Chem. A.</i> 2015, <b>3</b> , 6878            |
| CoMn LDH                                                         | Powder | 1M KOH      | 14  | 0.142     | –         | 0.33  | <i>J. Am. Chem. Soc.</i> 2014, <b>136</b> , 16481          |
| CoCo-NS                                                          | Powder | 1M KOH      | 14  | 0.07      | 0.31      | 0.35  | <i>Nat. Commun.</i> 2014, <b>5</b> , 4477                  |
| NiCo-NS                                                          | Powder | 1M KOH      | 14  | 0.07      | 0.29      | 0.33  |                                                            |
| NiFe-NS                                                          | Powder | 1M KOH      | 14  | 0.07      | 0.26      | 0.30  |                                                            |
| NiCo LDHs                                                        | Powder | 1M KOH      | 14  | 0.17      | 0.30      | 0.37  | <i>Nano Lett.</i> 2015, <b>15</b> , 1421                   |
| NNCNTAs                                                          | Powder | 0.1M KOH    | 13  | –         | 0.37      | 0.46  | <i>Adv. Funct. Mater.</i> 2014, <b>24</b> , 4698           |
| NiCo <sub>2</sub> S <sub>4</sub> @N/S-rGO                        | Powder | 0.1M KOH    | 13  | 0.283     | –         | 0.47  | <i>ACS Appl. Mater. Interfaces</i> , 2013, <b>5</b> , 5002 |
| NG-CoSe <sub>2</sub>                                             | Powder | 0.1M KOH    | 13  | 0.2       | –         | 0.37  | <i>Nano.</i> , 2014, <b>8</b> , 3970                       |
| CeO <sub>2</sub> /CoSe <sub>2</sub>                              | Powder | 0.1M KOH    | 13  | 0.2       | –         | 0.29  | <i>Small.</i> , 2015, <b>11</b> , 182                      |
| Co(PO <sub>3</sub> ) <sub>4</sub>                                | Powder | PBS         | 6.4 | 1.1       | 0.33      | 0.41  | <i>Adv. Funct. Mater.</i> , 2013, <b>23</b> , 227          |
| Co-P                                                             | Film   | 1M KOH      | 14  | 1         | –         | 0.35  | <i>Angew. Chem. Int. Ed.</i> , 2015, <b>54</b> , 6251      |
| De-LNiFeP/rGO                                                    | Powder | 0.1M KOH    | 13  | 0.5       | –         | 0.27  | <i>Energy Environ. Sci.</i> , 2015, <b>8</b> , 1719        |
| PCPTF                                                            | Film   | 1M KOH      | 14  | 0.1       | –         | 0.30  | <i>Adv. Mater.</i> , 2015, <b>27</b> , 3175                |
| NiCo                                                             | Film   | 1M KOH      | 14  | –         | –         | 0.42  | <i>J. Am. Chem. Soc.</i> , 2015, <b>137</b> , 4347         |
| Co/P                                                             | Film   | 1M KOH      | 14  | –         | –         | 0.38  |                                                            |
| Co/B                                                             | Film   | 1M KOH      | 14  | –         | –         | > 0.4 |                                                            |

|                                                    |        |          |    |       |           |       |                                                            |
|----------------------------------------------------|--------|----------|----|-------|-----------|-------|------------------------------------------------------------|
| Ni/B                                               | Film   | 1M KOH   | 14 | –     | –         | > 0.4 |                                                            |
| N-G-CoO                                            | Powder | 1M KOH   | 14 | 0.7   | –         | 0.34  | <i>Energy Environ. Sci.</i> , 2014, <b>7</b> , 609         |
| Co-P/NC                                            | Powder | 1M KOH   | 14 | 0.283 | –         | 0.35  | <i>Chem. Mater.</i> , 2015, <b>27</b> , 7636               |
| FeO <sub>x</sub>                                   | Powder | 0.1M KOH | 13 | –     | –         | 0.40  | <i>Adv. Energy Mater.</i> , 2016, <b>6</b> , 1502095       |
| Ni <sub>2.5</sub> Co <sub>0.5</sub> Fe/NF          | Powder | 0.1M KOH | 13 | –     | –         | 0.28  | <i>J. Mater. Chem. A</i> , 2016, <b>4</b> , 7245           |
| Ni <sub>2</sub> CoFe/NF                            | Powder | 0.1M KOH | 13 | –     | –         | 0.31  |                                                            |
| Ni <sub>3</sub> Fe/NF                              | Powder | 0.1M KOH | 13 | –     | –         | 0.31  |                                                            |
| Ni <sub>2.5</sub> Co <sub>0.5</sub> Fe/NF          | Powder | 1M KOH   | 14 | 0.3   | –         | 0.39  |                                                            |
| CQD/NiFe-LDH                                       | Powder | 0.1M KOH | 13 | –     | –         | 0.31  | <i>ACS Appl. Mater. Interfaces</i> , 2014, <b>6</b> , 7918 |
| n-NiFe LDH/NGF                                     | Powder | 0.1M KOH | 13 | –     | –         | 0.34  | <i>Adv. Mater.</i> , 2015, <b>27</b> , 4516                |
| NiFe LDH/oGSH                                      | Powder | 0.1M KOH | 13 | –     | –         | 0.35  | <i>J. Mater. Chem. A</i> , 2015, <b>3</b> , 24540          |
| m-NiFe/CN <sub>x</sub>                             | Powder | 0.1M KOH | 13 | –     | –         | 0.36  | <i>J. Mater. Chem. A</i> , 2015, <b>3</b> , 7986           |
| 3-D NiFe-LDH                                       | Powder | 0.1M KOH | 13 | –     | –         | 0.25  | <i>Chem. Commun.</i> , 2014, <b>50</b> , 6479              |
| O-NiCoFe-LDH                                       | Powder | 0.1M KOH | 13 | –     | –         | 0.42  | <i>Adv. Energy Mater.</i> , 2015, <b>5</b> , 1500245.      |
| a-Fe <sub>40</sub> Ni <sub>60</sub> O <sub>x</sub> | Powder | 0.1M KOH | 13 | –     | ~<br>0.25 |       | <i>J. Am. Chem. Soc.</i> , 2013, <b>135</b> , 11580        |
| Ni-Fe [40% Fe]                                     | Film   | 0.1M KOH | 13 | –     | –         | 0.42  | <i>J. Am. Chem. Soc.</i> , 2013, <b>135</b> , 12329        |
| NiFe LDH/NF                                        | Powder | 1M KOH   | 14 | –     | –         | 0.47  | <i>Science</i> , 2014, <b>345</b> , 1593                   |
| Ni(OH) <sub>2</sub> /NF                            | Powder | 1M KOH   | 14 | –     | –         | 0.59  |                                                            |
| NiFeO <sub>x</sub> /CFP                            | Powder | 1M KOH   | 14 | 1.6   | –         | 0.32  | <i>Nat. Commun.</i> , 2015, <b>6</b> , 7261.               |
| Ni <sub>2</sub> P/NF                               | Powder | 1M KOH   | 14 | 5     | –         | 0.40  | <i>Energy Environ. Sci.</i> , 2015, <b>8</b> , 2347        |
| Ni <sub>5</sub> P <sub>4</sub> /Ni foil            | Film   | 1M KOH   | 14 | 3.5   | –         | 0.47  | <i>Angew. Chem. Int. Ed.</i> , 2015, <b>54</b> , 12361     |
| Ni-P/Cu foam                                       | Film   | 1M KOH   | 14 | 5     | –         | 0.45  | <i>J. Power Sources</i> , 2015, <b>299</b> , 342           |
| NiSe/NF                                            | Powder | 1M KOH   | 14 | 2.8   | –         | 0.40  | <i>Angew. Chem. Int. Ed.</i> , 2015, <b>54</b> , 9351      |
| Ni <sub>3</sub> Se <sub>2</sub> /Cu foam           | Film   | 1M KOH   | 14 | 3     | –         | 0.42  | <i>Catal. Sci. Technol.</i> , 2015, <b>5</b> , 4954        |
| CoMnO@CN/NF                                        | Powder | 1M KOH   | 14 | 2     | –         | 0.27  | <i>J. Am. Chem. Soc.</i> , 2015, <b>137</b> , 14305        |
| Co <sub>3</sub> O <sub>4</sub> NCs/CFP             | Powder | 1M KOH   | 14 | 0.35  | –         | 0.68  | <i>Chem. Commun.</i> , 2015, <b>51</b> , 8066              |

\* As deposited catalyst film on various conducting substrates

\*\*Powder catalyst on GC electrode with

Nafion

PBS : Phosphate Buffer  
Solution

NF = Ni foam

n: nanometer-  
sized

m: mesoporous

a: amorphous

PNG: Porous Nitrogen-Doped Graphene

NNCNTAs : Ni@[Ni(2+/3+)Co<sub>2</sub>(OH)<sub>6-7</sub>]<sub>x</sub> nanotube arrays

oGSH: oxidized graphene/ single-walled CNT  
hybrids

PCPTF : Porous Co phosphide/phosphate thin film

De-LNiFeP/rGO : delithiated Li(Ni,Fe)PO<sub>4</sub>/rGO composite

NS = nano sheet

CFP: carbon fiber paper

CQD: Carbon quantum dot

\_ : Data not available in the respective references
